# Supplementary material for: Evaluation of the impact of shigellosis exclusion policies in childcare settings upon detection of a shigellosis outbreak
Source: BMC Infect Dis. 2019 Feb 19;19:172. doi: 10.1186/s12879-019-3796-7 (PMC6379933; doi:10.1186/s12879-019-3796-7)
Supplement: Supplementary file 2 — Appendix B. "A tool for the evaluation of shigellosis exclusion policies". In this supplement, the user may change the assumptions and see how that affects the results. (XLSX 122 kb) [file 12879_2019_3796_MOESM2_ESM.xlsx]

## Sheet: Title
	A tool for the evaluation of shigellosis exclusion policies
	Produced by: HEMU/DPEI and WDPB/DFWED, 2016
	Contact: Anna Bowen (NCEZID/ DFWED) and Martin Meltzer (NCEZID/DPEI/HEMU)
	Last Update: 1/21/2019

## Sheet: Description
	Description
	What the tool does
	The purpose of the tool is to assess alternative assess alternative exclusion policies to stop a shigella outbreak in childcare settings. The user can change the main parameters in the model (Table 2) to adapt them to the outbreak they are seeing or to the local conditions they need to assess
	The different policies to be evaluated are:
	2 tests	2 consecutive laboratory analyses of stool samples yield negative results;
	1 test	1 laboratory analysis of stool samples is negative
	14d after onset	14 days after symptom onset with no tests performed,
	7d after start of antimicrobial treatment	7 days after beginning of antimicrobial treatment
	24h symptom free	24 hours free of symptoms and no tests.
	The different treatments patients may undergo are:
	Immediate Treatment	Child gets to doctor and starts appropriate antibiotics on day 2 of illness
	Treatment after Diagnosis	Child gets to doctor on day 2 of illness, gets a stool culture, and appropriate treatment starts after culture results are available at day 4 of illness
	Wrong Treatment	Child gets to doctor and starts inappropriate antibiotics on day 2- 4 of illness
	No Treatment	Child is not treated
	The user needs to specify the parameters in the Inputs worksheet, and consult the results in the Results worksheet.
	How the tool evaluates shigellosis exclusion policies
	The tool calculates the number of chilcare-days lost (including weekends and holidays), and the likelihood a child or group of children will return to school infectious.
	Assumptions
	To calculate likelihood the child will return to school infectious:
	> For test based policies, the tool uses the probability of a false negative.
	> For policies based on a specific time interval, it is assumed that the percent of children still infectious decreases linearly with the number of days, and reaches 0 at the end of the shedding period.
	To calculate the number of childcare-days lost:
	> For test based policies, the tool uses information on the time it takes to receive test results, shedding duration, and treatment duration.
	> For policies based on a specific time interval, the tool uses information on the time interval, symptom duration when applicable, and treatment duration when applicable.

## Sheet: Index
	Index
	The user needs to specify the parameters in the Inputs worksheet, and consult the results in the Results worksheet.
	Worksheets
	Inputs - Policies	Insert parameters necessary to evaluate different policies, for patients undergoing different treatments.
	Inputs - Treatment
	Inputs - Outbreak
	Results 1	Check Results for 1) percent of infectious patients returning to school for different policies, and different treatment types; 2)percent of infectious patients returning to school for different policies, for a given treatment mix; 3) childcare days lost for assumed treatment mix.
	Results 2
	Results 3
	Calculations 1	Details of the calculations for the results obtained
	Calculations 2
	Treatment type: Treatments A-D
	Treatment mix: assumed mix of Treatments A-D in the population, defined in Worksheet Inputs-Treatment

## Sheet: Inputs - Policies
	Inputs
	Exclusion policies to be evaluated	Return to school after
	2 tests	2 consecutive laboratory analyses of stool samples yield negative results;
	1 test	1 laboratory analysis of stool samples is negative
	14d after onset	14 days after symptom onset with no tests performed,
	7d after start of antimicrobial treatment	7 days after beginning of antimicrobial treatment
	24h symptom free	24 hours free of symptoms and no tests.
	Parameters required to evaluate the impact of different exclusion policies
		Lower Bound	Midpoint	Upper Bound
	Test's sensitivity - PCR	0.94	0.96	0.98
	Test's sensitivity - Culture	0.44	0.5184	0.72
	Test's specificity (Culture or PCR)	0.9	0.95	0.99
	Notes:
	PCR-positive assumption: we are assuming a 1:1 correlation between PCR positive and patients being infectious

## Sheet: Inputs - Treatment
	Inputs
	Treatment types to be considered	Description
	Immediate Treatment	Child gets to doctor and starts appropriate antibiotics on day 2 of illness
	Treatment after Diagnosis	Child gets to doctor on day 2 of illness, gets a stool culture/PCR tests, and appropriate treatment starts after culture results are available at day 4 of illness/ PCR results are available at day 3
	Wrong Treatment	Child gets to doctor and starts inappropriate antibiotics on day 1 to 4 of illness
	No Treatment	Child is not treated
	Parameters regarding different patient types					A - Immediate Treatment			B - Treatment after Diagnosis			C - Wrong Treatment			D - No Treatment
						Lower Bound	Midpoint	Upper Bound	Lower	Midpoint	Upper	Lower	Midpoint	Upper	Lower	Midpoint	Upper
	Epidemiological inputs	Duration of shedding for shigella (days)				1	3.6	5	3	5.6	7	17	31	41	4	11	31
		Duration of symptoms for shigella (days)				1	3.6	5	3	5.6	7	1	10	41	1	5	30
		Percent of patients remaining infectious 7 days after beginning of antimicrobial treatment				0			0			1			-	-	-
	Wait parameters	Duration of antimicrobial treatment				5	5	5	5	5	5	5	5	5	-	-	-
		Time from doing test to receiving results - PCR				1	2	6	1	2	6	1	2	6	1	2	6
		Time from doing test to receiving results - Culture				2	3	7	2	3	7	2	3	7	2	3	7
	Notes:
	PCR-positive assumption: we are assuming a 1:1 correlation between PCR positive and patients being infectious
	Distribution of different types of treatments that patients with shigellosis receive
	Type of Treatment	Option 1 (%)	Option 2 (%)	Option 3 (%)
	A	0.5	0.25	0.15
	B	0.4	0.25	0.15
	C	0.05	0.25	0.2
	D	0.05	0.25	0.5
	Total (needs to equal 100%)	1	1	1
	* Assumption: for exclusion policies that do not include "no treatment" patient type, we divided the distribution of "no treatment" patients equally among other types of patients
	This distribution will be used to calculate results in worksheets Results 2 and Results 3.

## Sheet: Inputs - Outbreak
	Inputs
	Outbreaks to be considered
	Outbreaks will be characterized by setting size, and attack rate, as defined below.
	Characteristics of the outbreak
	Attack Rate	0.25
	Setting Size	45
	Results will be calculated per attack rate, and setting size
	Setting size corresponds to the number of children attending the facility; the number of childcare-days lost will be calculated for this population.
	Suggested parameter values
	Attack Rate
	Lower Bound	Midpoint	Upper Bound
	0.1	0.25	0.42
	Setting Size
	Lower Bound	Midpoint	Upper Bound
	30	45	60

## Sheet: Results 1
	Results 1 - Evaluation of alternative exclusion policies for children with shigellosis
	Percentage of infectious patients returning to school, per patient treatment A-D
	The picture below shows, for each policy, the percent of children returning to school while infectious (vertical axis), and the number of childcare-days lost per child (including weekends and holidays, horizontal axis).
	The results are shown per patient treatment meaning, for children assumed to receive treatments A-D.
	Results corresponds to Figure 2 in the main manuscript.
		Different points show the results of different policies, for different treatment mixes.

## Sheet: Results 2
	Results 2 - Evaluation of alternative exclusion policies for children with shigellosis
	Percentage of infectious patients returning to school, per patient mix
	The picture below shows, for each policy, the percent of children returning to school while infectious (vertical axis), and the number of aggregate childcare-days losts (including weekends and holidays, horizontal axis).
	The results are shown per patient mix, meaning, per a group of children in which different numbers of children take different treatments (as specified in the Inputs-Treatment worksheet, cells B22-E28).
		Different points show the results of different policies, for different treatment mixes.

## Sheet: Results 3
	Results 3: Evaluation of alternative exclusion policies for children with shigellosis
	The picture below shows, for each policy, aggregated childcare days lost in outbreak (childcare-days lost for a group of individuals), for outbreak and childcare characteristics specified in the Inputs-Outbreak worksheet.
	The results are shown per patient mix, meaning, per a group of children in which different numbers of children take different treatments (as specified in the Inputs-Treatment worksheet, cells B22-E28).
	These results are shown in Appendix C in the manuscript.
	Assuming Patient Mix as in Option 1
	Assuming Patient Mix as in Option 2
	Assuming Patient Mix as in Option 3
	750

## Sheet: Calculations 1
	Calculations
		Patient Type	Immediate Treatment			Treatment After Diagnosis			Wrong Treatment			No Treatment
		Exclusion policy	% of individuals infectious after policy			% of individuals infectious after policy			% of individuals infectious after policy			% of individuals infectious after policy
		Values	Low	Midpoint	High	Low	Midpoint	High	Low	Midpoint	High	Low	Midpoint	High
		2 consecutive laboratory analyses of stool samples yield negative results - PCR	0.0004	0.0016	0.0036	0.0004	0.0016	0.0036	0.0004	0.0016	0.0036	0.0004	0.0016	0.0036
		2 consecutive laboratory analyses of stool samples yield negative results - Culture	0.0784	0.231939	0.3136	0.0784	0.231939	0.3136	0.0784	0.231939	0.3136	0.0784	0.231939	0.3136
		1 laboratory analysis of stool samples is negative - PCR	0.02	0.04	0.06	0.02	0.04	0.06	0.02	0.04	0.06	0.02	0.04	0.06
		1 laboratory analysis of stool samples is negative - Culture	0.28	0.4816	0.56	0.28	0.4816	0.56	0.28	0.4816	0.56	0.28	0.4816	0.56
		14 days after symptom identification, with no tests performed	0	0	0	0	0	0	0.176471	0.548387	0.658537	0	0	0.548387
		7 days following beginning treatment	0	0	0	0	0	0	1	1	1	-	-	-
		24 hours free of symptoms and no tests	0	0	0	0	0	0	0	0.645161	0.882353	0	0.454545	0.5
	1	Assuming uniform distribution for shedding duration							0.882353	0.645161	0	0.5	0.454545	0
		Number of days child spends at home
		Patient Type	Immediate Treatment			Treatment After Diagnosis			Wrong Treatment			No Treatment
		Value	Low	Midpoint	High	Low	Midpoint	High	Low	Midpoint	High	Low	Midpoint	High
		2 consecutive laboratory analyses of stool samples yield negative results - PCR	7	9	17	7	9.59904	18.9928	18.9952	34.9584	52.8704	5.9984	14.9824	42.8884
		2 consecutive laboratory analyses of stool samples yield negative results - Culture	9	11	19	9	11.4608	20.3728	20.0592	30.9696	43.7104	7.6864	14.4487	35.2784
		1 laboratory analysis of stool samples is negative - PCR	6	7	11	6	7.576	12.88	17.76	31.96	44.84	4.92	12.56	35.14
		1 laboratory analysis of stool samples is negative - Culture	7	8	12	7	8.31104	12.88	15.64	21.4784	27.84	4.88	8.7024	20.64
		14 days after symptom identification, with no tests performed	14	14	14	14	14	14	14	14	14	14	14	14
		7 days following beginning treatment	7	7	7	7	7	7	7	7	7	-	-	-
		24 hours free of symptoms and no tests	2	4.6	6	4	6.6	8	2	11	42	2	6	31
		Graph
		Patient Type	Immediate Treatment						Treatment After Diagnosis						Wrong Treatment						No Treatment
		Exclusion policy	Number of days child spends at home			% of individuals infectious after policy			Number of days child spends at home			% of individuals infectious after policy			Number of days child spends at home			% of individuals infectious after policy			Number of days child spends at home			% of individuals infectious after policy
		Value	Low	Midpoint	High	Low	Midpoint	High	Low	Midpoint	High	Low	Midpoint	High	Low	Midpoint	High	Low	Midpoint	High	Low	Midpoint	High	Low	Midpoint	High
		Two consecutive tests: PCR	7	9	17	0.0004	0.0016	0.0036	7	9.59904	18.9928	0.0004	0.0016	0.0036	18.9952	34.9584	52.8704	0.0004	0.0016	0.0036	5.9984	14.9824	42.8884	0.0004	0.0016	0.0036
		Two consec. Tests: culture	9	11	19	0.0784	0.231939	0.3136	9	11.4608	20.3728	0.0784	0.231939	0.3136	20.0592	30.9696	43.7104	0.0784	0.231939	0.3136	7.6864	14.4487	35.2784	0.0784	0.231939	0.3136
		One test: PCR	6	7	11	0.02	0.04	0.06	6	7.576	12.88	0.02	0.04	0.06	17.76	31.96	44.84	0.02	0.04	0.06	4.92	12.56	35.14	0.02	0.04	0.06
		One test: culture	7	8	12	0.28	0.4816	0.56	7	8.31104	12.88	0.28	0.4816	0.56	15.64	21.4784	27.84	0.28	0.4816	0.56	4.88	8.7024	20.64	0.28	0.4816	0.56
		14 days after onset	14	14	14	0	0	0	14	14	14	0	0	0	14	14	14	0.176471	0.548387	0.658537	14	14	14	0	0	0.548387
		7 days after beginning Tx	7	7	7	0	0	0	7	7	7	0	0	0	7	7	7	1	1	1	-	-	-	-	-	-
		24 hr symptom free	2	4.6	6	0	0	0	4	6.6	8	0	0	0	2	11	42	0	0.645161	0.882353	2	6	31	0	0.454545	0.5
		Exclusion policy	2 consecutive laboratory analyses of stool samples yield negative results - PCR						2 consecutive laboratory analyses of stool samples yield negative results - Culture						1 laboratory analysis of stool samples is negative - PCR						1 laboratory analysis of stool samples is negative - Culture						14 days after symptom identification, with no tests performed						7 days following beginning of antimicrobial treatment						24 hours free of symptoms and no tests
		Patient Type	Number of days child spends at home			% of individuals infectious after policy			Number of days child spends at home			% of individuals infectious after policy			Number of days child spends at home			% of individuals infectious after policy			Number of days child spends at home			% of individuals infectious after policy			Number of days child spends at home			% of individuals infectious after policy			Number of days child spends at home			% of individuals infectious after policy			Number of days child spends at home			% of individuals infectious after policy
		Value	Low	Midpoint	High	Low	Midpoint	High	Low	Midpoint	High	Low	Midpoint	High	Low	Midpoint	High	Low	Midpoint	High	Low	Midpoint	High	Low	Midpoint	High	Low	Midpoint	High	Low	Midpoint	High	Low	Midpoint	High	Low	Midpoint	High	Low	Midpoint	High	Low	Midpoint	High
		A	2	9	8	0.0012	0.0016	0.002	2	11	8	0.153539	0.231939	0.0816614	1	7	4	0.02	0.04	0.02	1	8	4	0.2016	0.4816	0.0784	0	14	0	0	0	0	0	7	0	0	0	0	2.6	4.6	1.4	0	0	0
		B	2.59904	9.59904	9.39376	0.0012	0.0016	0.002	2.46084	11.4608	8.91196	0.153539	0.231939	0.0816614	1.576	7.576	5.304	0.02	0.04	0.02	1.31104	8.31104	4.56896	0.2016	0.4816	0.0784	0	14	0	0	0	0	0	7	0	0	0	0	2.6	6.6	1.4	0	0	0
		C	15.9632	34.9584	17.912	0.0012	0.0016	0.002	10.9104	30.9696	12.7408	0.153539	0.231939	0.0816614	14.2	31.96	12.88	0.02	0.04	0.02	5.8384	21.4784	6.3616	0.2016	0.4816	0.0784	0	14	0	0.371917	0.548387	0.110149	0	7	0	0	1	0	9	11	31	0.645161	0.645161	0.237192
		D	8.984	14.9824	27.906	0.0012	0.0016	0.002	6.76228	14.4487	20.8297	0.153539	0.231939	0.0816614	7.64	12.56	22.58	0.02	0.04	0.02	3.8224	8.7024	11.9376	0.2016	0.4816	0.0784	0	14	0	0	0	0.548387							4	6	25	0.454545	0.454545	0.0454545
		Type of Treatment	Option 1 (%)	Option 2 (%)	Option 3 (%)
		A	0.5	0.25	0.15
		B	0.4	0.25	0.15
		C	0.05	0.25	0.2
		D	0.05	0.25	0.5
		Exclusion policy	2 consecutive laboratory analyses of stool samples yield negative results - PCR						2 consecutive laboratory analyses of stool samples yield negative results - Culture						1 laboratory analysis of stool samples is negative - PCR						1 laboratory analysis of stool samples is negative - Culture						14 days after symptom identification, with no tests performed						7 days following beginning of antimicrobial treatment						24 hours free of symptoms and no tests
		Option - combination	Number of days child spends at home			% of individuals infectious after policy			Number of days child spends at home			% of individuals infectious after policy			Number of days child spends at home			% of individuals infectious after policy			Number of days child spends at home			% of individuals infectious after policy			Number of days child spends at home			% of individuals infectious after policy			Number of days child spends at home			% of individuals infectious after policy			Number of days child spends at home			% of individuals infectious after policy
		Value	Low	Midpoint	High	Low	Midpoint	High	Low	Midpoint	High	Low	Midpoint	High	Low	Midpoint	High	Low	Midpoint	High	Low	Midpoint	High	Low	Midpoint	High	Low	Midpoint	High	Low	Midpoint	High	Low	Midpoint	High	Low	Midpoint	High	Low	Midpoint	High	Low	Midpoint	High
		1	3.28698	10.8367	10.0484	0.0012	0.0016	0.002	2.86797	12.3552	9.24331	0.153539	0.231939	0.0816614	2.2224	8.7564	5.8946	0.02	0.04	0.02	1.50746	8.83346	4.74254	0.2016	0.4816	0.0784	0	14	0	0.0185958	0.0274194	0.0329268	0	7	0	0	0.0666667	0	2.99	5.79	4.06	0.0549853	0.0549853	0.0141323
		2	7.38656	17.135	15.8029	0.0012	0.0016	0.002	5.53338	16.9698	12.6206	0.153539	0.231939	0.0816614	6.104	14.774	11.191	0.02	0.04	0.02	2.99296	11.623	6.71704	0.2016	0.4816	0.0784	0	14	0	0.0929791	0.137097	0.164634	0	7	0	0	0.333333	0	4.55	7.05	14.7	0.274927	0.274927	0.0706615
		3	8.3745	17.2727	20.1445	0.0012	0.0016	0.002	6.23234	16.7874	15.4998	0.153539	0.231939	0.0816614	7.0464	14.8584	15.2616	0.02	0.04	0.02	3.42554	11.0935	8.52646	0.2016	0.4816	0.0784	0	14	0	0.0743833	0.109677	0.296223	0	7	0	0	0.366667	0	4.58	6.88	19.12	0.356305	0.356305	0.0701656

[truncated: 2 more sheets: Calculations 2, Sources (2)]
